# Supplementary material for: Hyaluronidase Inhibitor-Incorporated Cross-Linked Hyaluronic Acid Hydrogels for Subcutaneous Injection
Source: Pharmaceutics. 2021 Jan 27;13(2):170. doi: 10.3390/pharmaceutics13020170 (PMC7910999; doi:10.3390/pharmaceutics13020170)
Supplement: Supplementary file 1 [file pharmaceutics-13-00170-s001.pdf]

Supplementary Materials

# Hyaluronidase Inhibitor-Incorporated Cross-Linked Hyaluronic Acid Hydrogels for Subcutaneous Injection

Min-Hwan Kim, Ju-Hwan Park, Duy-Thuc Nguyen, Sungyun Kim, Da In Jeong, Hyun-Jong Cho and Dae-Duk Kim

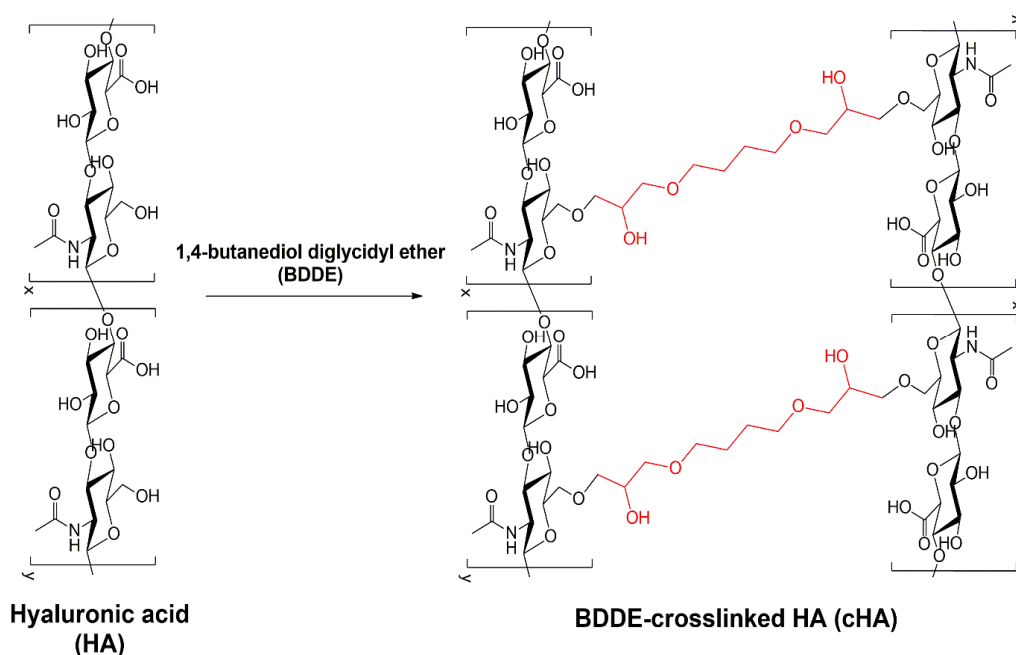

Figure S1. Synthesis of HA-BDDE (cHA) conjugate.

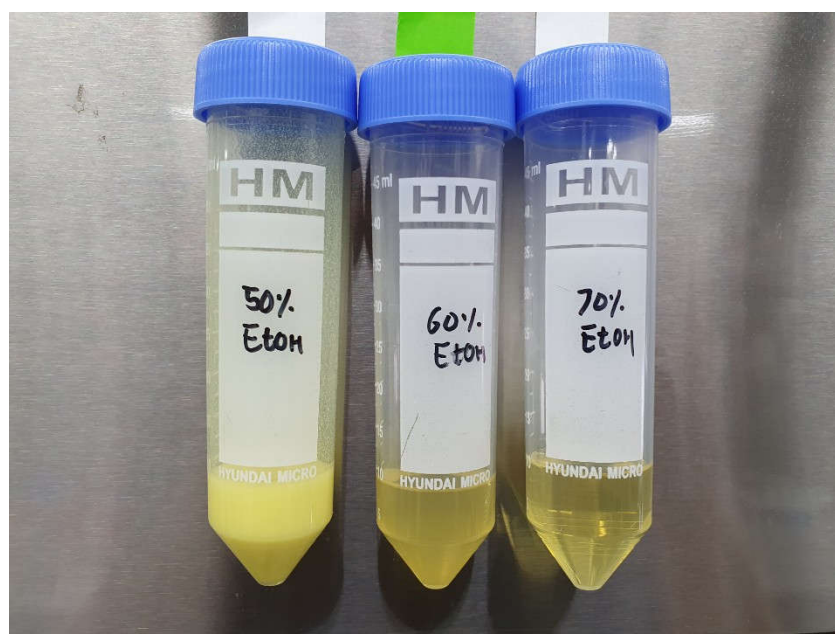

Figure S2. Images of QCT dispersion (at 5 mg/mL) in 50%, 60%, and 70% EtOH (in DW).

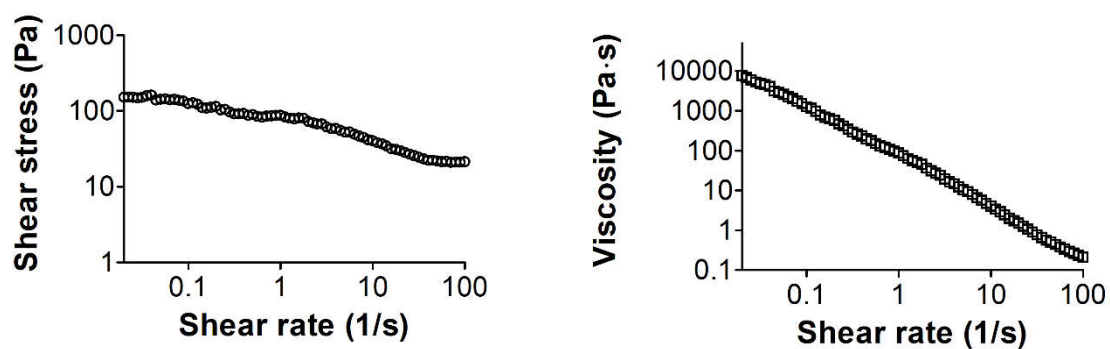

**Figure S3.** Shear rate-dependent shear stress and viscosity profiles of cHA/QTP/QCT5 hydrogel.

**Table S1.** Korsmeyer-Peppas modeling of release data of QTP.

| Group                | $R^2$  | $k_{KP}$ | $n$    |
|----------------------|--------|----------|--------|
| Free QTP             | 0.7126 | 62.75    | 0.1311 |
| cHA/QTP              | 0.9540 | 0.904    | 0.973  |
| cHA/QTP/QCT5         | 0.9534 | 0.348    | 1.086  |
| cHA/QTP/QCT5 + HAase | 0.9952 | 1.062    | 0.775  |

Korsmeyer-Peppas equation:  $F = k_{KP} \times t^n$
